# Supplementary material for: Stimuli-responsive dendronized polymeric hydrogels through Schiff-base chemistry showing remarkable topological effects
Source: Royal Society of Chemistry journal article supplement (doi:10.1039/c7py01865g), 2017-12-19
Supplement: c7py01865g1.pdf [file c7py01865g1.pdf]

*Supplementary Information*

**Stimuli-Responsive Dendronized Polymeric Hydrogels through Schiff-Base Chemistry Showing Remarkable Topological Effects**

Jie Liu, ‡<sup>a</sup> Xiacong Zhang, ‡<sup>a</sup> Xiao Chen,<sup>a</sup> Liangliang Qu,<sup>b</sup> Liyuan Zhang,<sup>b</sup> Wen Li \*<sup>a,b</sup> and Afang Zhang<sup>a</sup>

<sup>a</sup>Department of Polymer Materials, School of Materials Science & Engineering, Shanghai University, Shanghai 200444, China. Phone: +86-21-66138044.

<sup>b</sup>School of Engineering and Applied Sciences, Department of Physics, Harvard University, 29 Oxford Street, Cambridge, MA 02138, USA.

‡ These authors contributed equally to this work.

\*Correspondence to: E-mail: wli@shu.edu.cn

## Table of Contents

|                                                                                                                                                                                                                                                                                     |    |
|-------------------------------------------------------------------------------------------------------------------------------------------------------------------------------------------------------------------------------------------------------------------------------------|----|
| <b>Scheme S1</b> Synthetic routes for Sanger's reagent modified monomers <b>AEMA-S</b> and its corresponding copolymers <b>PG1A-S</b> and <b>PG0A-S</b> .....                                                                                                                       | S3 |
| <b>Fig. S1</b> <sup>1</sup> H NMR spectra of copolymers <b>PG1<sub>5</sub>A<sub>1</sub></b> and <b>PG1<sub>5</sub>A<sub>1</sub>-S</b> in CDCl <sub>3</sub> at room temperature.....                                                                                                 | S3 |
| <b>Fig. S2</b> <sup>1</sup> H NMR spectra of polymers <b>PG1<sub>10</sub>A<sub>1</sub></b> and <b>PG1<sub>10</sub>A<sub>1</sub>-S</b> in CDCl <sub>3</sub> at room temperature.....                                                                                                 | S4 |
| <b>Fig. S3</b> <sup>1</sup> H NMR spectra of polymers <b>PG0<sub>15</sub>A<sub>1</sub></b> and <b>PG0<sub>15</sub>A<sub>1</sub>-S</b> in CDCl <sub>3</sub> at room temperature. ....                                                                                                | S4 |
| <b>Fig. S4</b> <sup>1</sup> H NMR spectrum of the monomer <b>AEMA-S</b> in CDCl <sub>3</sub> at room temperature.....                                                                                                                                                               | S5 |
| <b>Fig. S5</b> a) UV/Vis spectra of <b>AEMA-S</b> aqueous solutions at different concentrations and b) <b>PG1<sub>5</sub>A<sub>1</sub>-S</b> , <b>PG1<sub>10</sub>A<sub>1</sub>-S</b> and <b>PG0<sub>15</sub>A<sub>1</sub>-S</b> aqueous solutions at different concentrations..... | S5 |
| <b>Fig. S6</b> Plots of transmittance versus temperature for copolymers <b>PG1<sub>5</sub>A<sub>1</sub></b> , <b>PG1<sub>10</sub>A<sub>1</sub></b> and <b>PG0<sub>15</sub>A<sub>1</sub></b> in 0.25 wt % aqueous solutions. ....                                                    | S5 |
| <b>Fig. S7</b> Photographs of self-healing process of the hydrogel by optical microscope.                                                                                                                                                                                           | S6 |
| <b>Fig. S8</b> Comparison of rheological properties of hydrogels <b>PG1<sub>5</sub>A<sub>1</sub></b> and <b>PG0<sub>15</sub>A<sub>1</sub></b> prepared at a) above polymer T <sub>c</sub> and b) below polymer T <sub>f</sub> .....                                                 | S6 |
| <b>Fig. S9</b> SEM images of <b>PG0<sub>15</sub>A<sub>1</sub></b> hydrogels prepared at a) 33 °C and b) -22 °C.....                                                                                                                                                                 | S6 |
| <b>Fig. S10</b> Swelling behavior (A) and rheological properties (B) of three different hydrogels from <b>PG1<sub>5</sub>A<sub>1</sub></b> prepared in different buffer solutions.....                                                                                              | S7 |
| <b>Synthesis of Sanger's reagent modified compounds</b> .....                                                                                                                                                                                                                       | S7 |

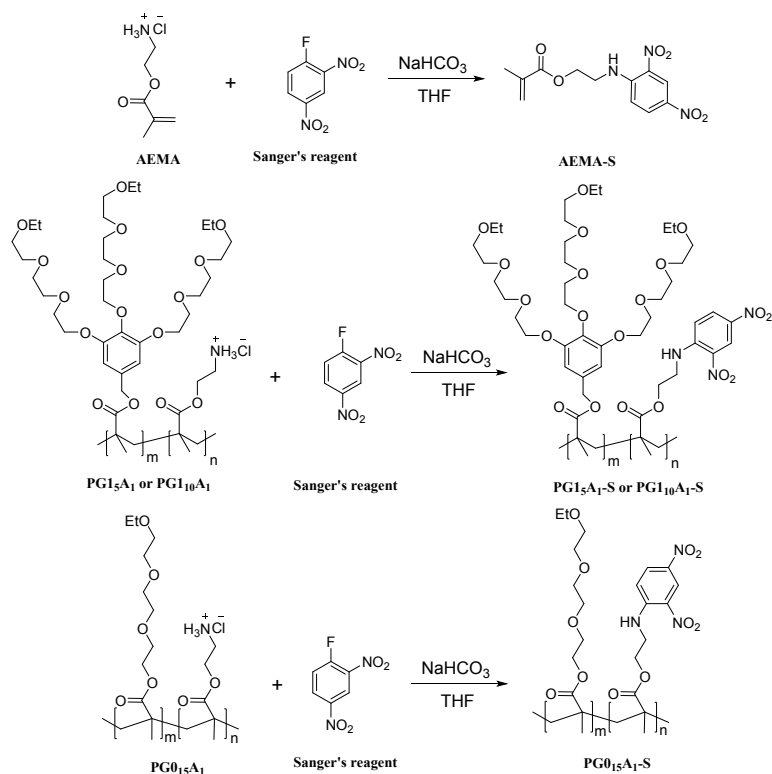

**Scheme S1** Synthetic routes for Sanger's reagent modified monomers **AEMA-S** and its corresponding copolymers **PG1A-S** and **PG0A-S**.

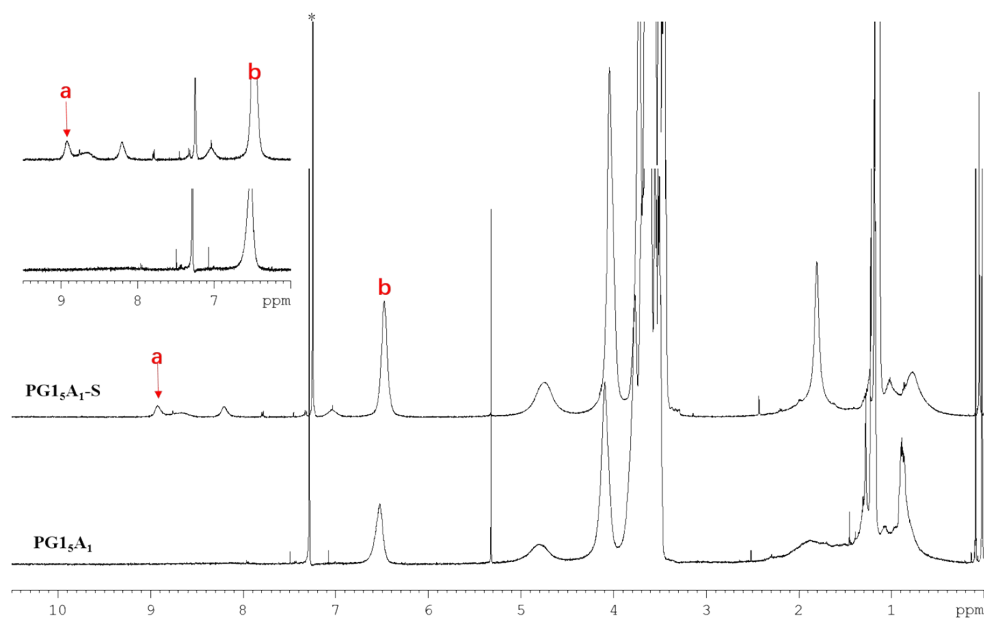

**Fig. S1**  $^1\text{H}$  NMR spectra of copolymers **PG1<sub>5</sub>A<sub>1</sub>** and **PG1<sub>5</sub>A<sub>1</sub>-S** in  $\text{CDCl}_3$  at room temperature. The signals from  $\text{CDCl}_3$  are marked as \*.

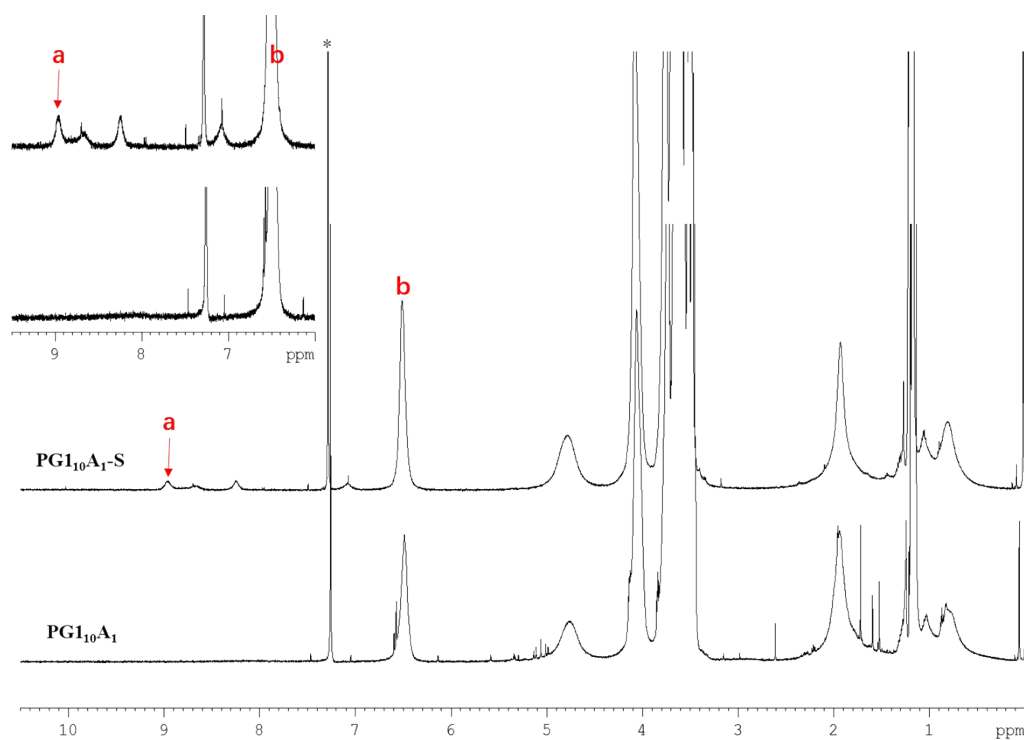

**Fig. S2**  $^1\text{H}$  NMR spectra of polymers **PG1<sub>10</sub>A<sub>1</sub>** and **PG1<sub>10</sub>A<sub>1</sub>-S** in  $\text{CDCl}_3$  at room temperature. The signals from  $\text{CDCl}_3$  are marked as \*.

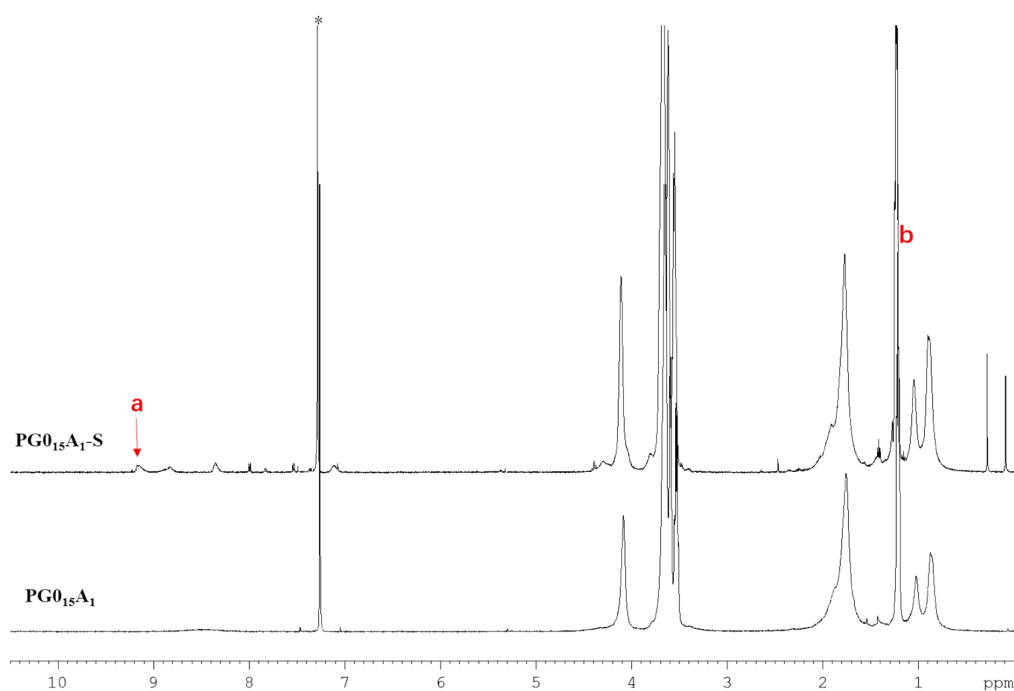

**Fig. S3**  $^1\text{H}$  NMR spectra of polymers **PG0<sub>15</sub>A<sub>1</sub>** and **PG0<sub>15</sub>A<sub>1</sub>-S** in  $\text{CDCl}_3$  at room temperature. The signals from  $\text{CDCl}_3$  are marked as \*.

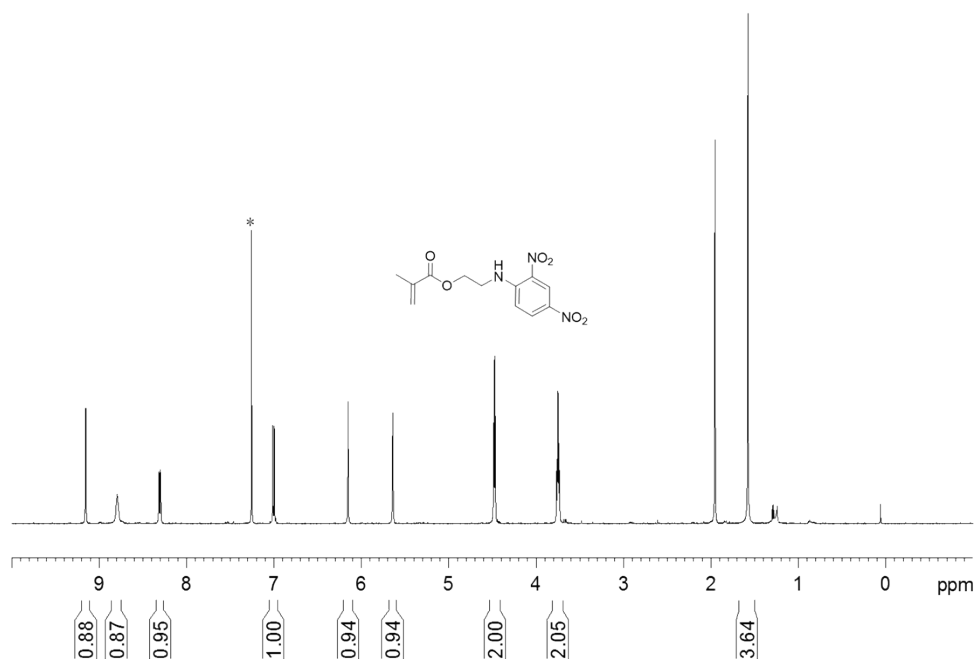

**Fig. S4**  $^1\text{H}$  NMR spectrum of the monomer AEMA-S in  $\text{CDCl}_3$  at room temperature. The signals from  $\text{CDCl}_3$  are marked as \*.

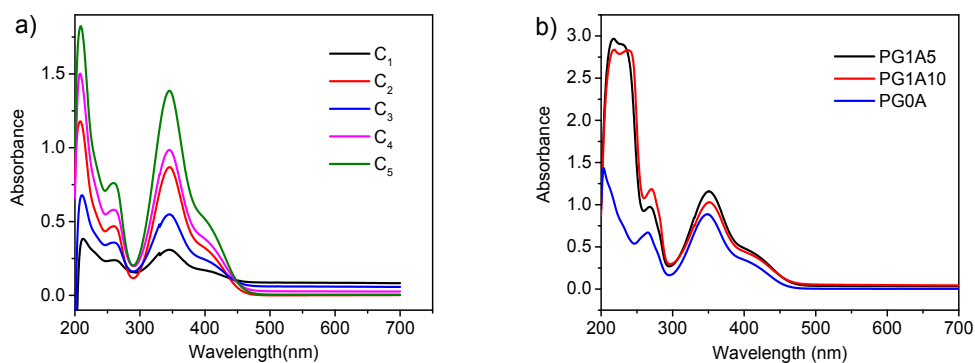

**Fig. S5** a) UV/Vis spectra of AEMA-S aqueous solutions at different concentrations and b) PG15A1-S, PG10A1-S and PG015A1-S aqueous solutions at different concentrations.

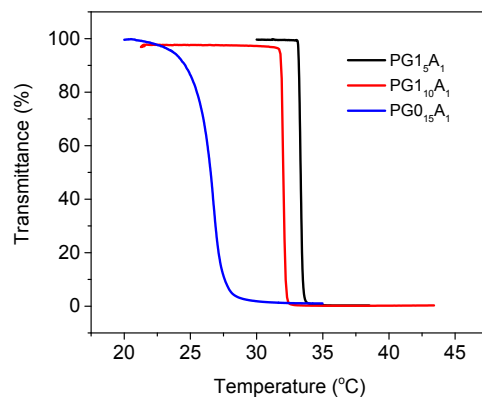

**Fig. S6** Plots of transmittance versus temperature for copolymers PG15A1, PG10A1 and PG015A1 in 0.25 wt % aqueous solutions. Heating and cooling rate = 10 °C/min.

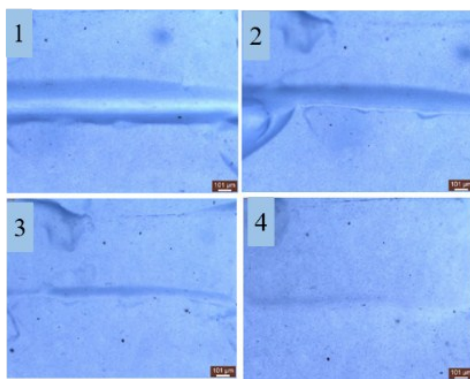

**Fig. S7** Photographs of self-healing process of the hydrogel by optical microscope.

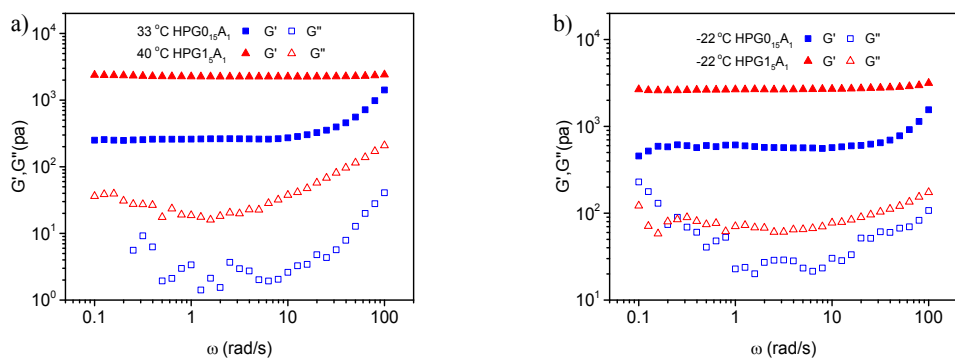

**Fig. S8** Comparison of rheological properties of hydrogels **PG1<sub>5</sub>A<sub>1</sub>** and **PG0<sub>15</sub>A<sub>1</sub>** prepared at a) above polymer  $T_c$  and b) below polymer  $T_f$ .

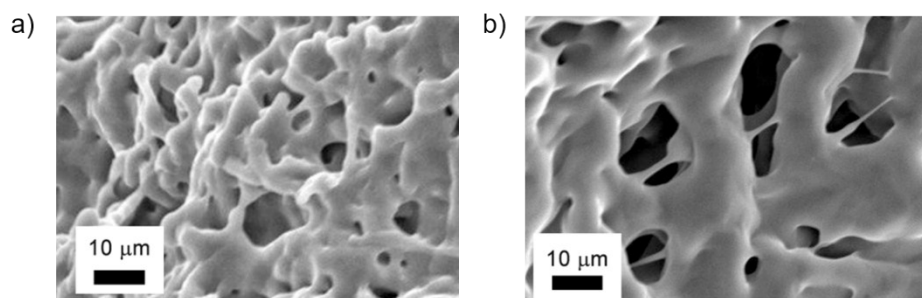

**Fig. S9** SEM images of **PG0<sub>15</sub>A<sub>1</sub>** hydrogels prepared at a) 33 °C and b) -22 °C.

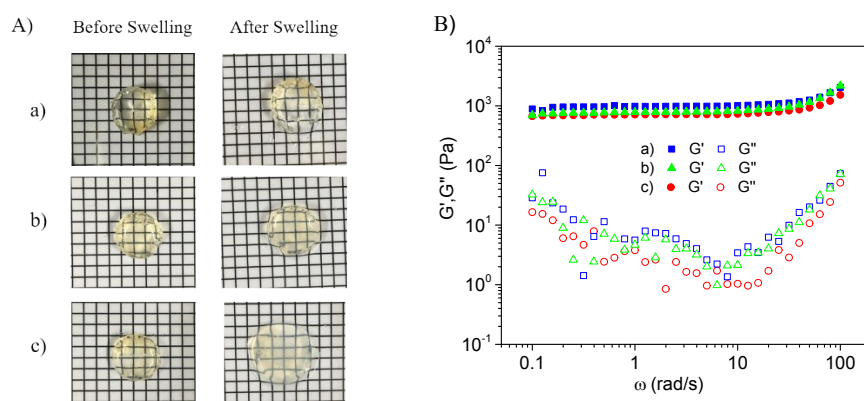

**Fig. S10** Swelling behavior (A) and rheological properties (B) of three different hydrogels from **PG1<sub>5</sub>A<sub>1</sub>** prepared in different buffer solutions (25 °C, 10 wt%): a) NaHCO<sub>3</sub>/NaOH, b) KHCO<sub>3</sub>/KOH, c) NH<sub>4</sub>Cl/NH<sub>4</sub>OH.

### Synthesis of Sanger's reagent modified compounds

**General procedures.** A solution of **AEMA** or **PGAs** in THF and H<sub>2</sub>O was treated with NaHCO<sub>3</sub> and 1-fluoro-2, 4-dinitrobenzene and then stirred for 8 h at room temperature, diluted with ethyl acetate, and washed with saturated aqueous NH<sub>4</sub>Cl solution. The aqueous phase was re-extracted once with ethyl acetate, and the combined organic phases were dried over MgSO<sub>4</sub> and concentrated. After that, the copolymer was dialyzed against deionized water and lyophilized.

**AEMA-S:** According to general procedure for reaction, from **AEMA** (22.17 mg, 0.13 mmol), THF (2 mL), NaHCO<sub>3</sub> (20.32 mg, 0.24 mmol) and 1-fluoro-2, 4-dinitrobenzene (79 mg, 0.43 mmol), stirred for 8 h at room temperature afforded AEMA-S (28.33 mg, 72%) as a yellow solid. <sup>1</sup>H NMR (CDCl<sub>3</sub>,  $\delta$ ): 1.58 (s, 3H, CH<sub>3</sub>), 3.75 (q, 2H, CH<sub>2</sub>), 4.48 (t, 2H, CH<sub>2</sub>), 5.64 (s, 1H, CH), 6.15 (s, 1H, CH), 7.00 (d, 1H, ArH), 8.29-8.32 (m, 1H, ArH), 8.79 (s, 1H, NH), 9.15 (d, 1H, ArH).

**PG1<sub>5</sub>A<sub>1</sub>-S:** According to general procedure for reaction, from **PG1<sub>5</sub>A<sub>1</sub>** (21.11 mg), THF (0.5 mL), NaHCO<sub>3</sub> (1.50 mg, 0.017 mmol) and 1-fluoro-2, 4-dinitrobenzene (10.00 mg, 0.06 mmol), stirred for 8 h at room temperature afforded PG1<sub>5</sub>A<sub>1</sub>-S as a yellow solid. <sup>1</sup>H NMR (CDCl<sub>3</sub>,  $\delta$ ): 0.20-1.45 (m, CH+CH<sub>2</sub>), 1.43-2.72 (m, CH<sub>2</sub>), 2.80-4.38 (m, CH<sub>2</sub>), 4.75 (s, CH<sub>2</sub>), 6.48 (br, ArH), 7.05 (br, ArH), 8.21 (br, ArH), 8.67 (br, NH), 8.92 (br, ArH).

**PG1<sub>10</sub>A<sub>1</sub>-S:** According to general procedure for reaction, from **PG1<sub>10</sub>A<sub>1</sub>** (20.04 mg), THF (0.5 mL), NaHCO<sub>3</sub> (1.53 mg, 0.017 mmol) and 1-fluoro-2,4-dinitrobenzene (10.00 mg, 0.06 mmol), stirred for 8 h at room temperature afforded PG1<sub>10</sub>A<sub>1</sub>-S as a yellow solid. <sup>1</sup>H NMR (CDCl<sub>3</sub>, δ): 0.22-1.52 (m, CH+CH<sub>2</sub>), 1.55-2.73 (m, CH<sub>2</sub>), 2.80-4.41 (m, CH<sub>2</sub>), 4.89 (s, CH<sub>2</sub>), 6.51(br, ArH)7.08 (br, ArH), 8.26 (br, ArH), 8.67 (br, NH), 8.98 (br, ArH).

**PG0<sub>15</sub>A<sub>1</sub>-S:** According to general procedure for reaction, from **PG0<sub>15</sub>A<sub>1</sub>** (20.11 mg), THF (0.5 mL), NaHCO<sub>3</sub> (1.62 mg, 0.019 mmol) and 1-fluoro-2,4-dinitrobenzene (10.00 mg, 0.06 mmol), stirred for 8 h at room temperature afforded PG0<sub>15</sub>A<sub>1</sub>-S as a yellow solid. <sup>1</sup>H NMR (CDCl<sub>3</sub>, δ): 0.86-1.02 (m, CH+CH<sub>2</sub>), 1.54-2.12 (m, CH<sub>2</sub>), 3.40-3.86 (m, CH<sub>2</sub>), 3.93-4.18 (m, CH<sub>2</sub>), 7.08 (br, ArH), 8.34 (br, ArH), 8.79 (br, NH), 9.11 (br, ArH).
